# Supplementary material for: N6-Methyladenosine Methylation Regulator RBM15 is a Potential Prognostic Biomarker and Promotes Cell Proliferation in Pancreatic Adenocarcinoma
Source: Front Mol Biosci. 2022 Feb 9;9:842833. doi: 10.3389/fmolb.2022.842833 (PMC8864094; doi:10.3389/fmolb.2022.842833)
Supplement: Supplementary file 2 [file Table1.XLSX]

## Sheet: Sheet1
Supplementary Table 1. Mutation type of RBM15 in human pan-cancer
Study	Sample ID	Cancer Type	Protein Change	Mutation Type
Thyroid Carcinoma (TCGA, PanCancer Atlas)	TCGA-EL-A3TB-01	Papillary Thyroid Cancer	S212R	Missense_Mutation
Adrenocortical Carcinoma (TCGA, PanCancer Atlas)	TCGA-OR-A5JF-01	Adrenocortical Carcinoma	D682H	Missense_Mutation
Kidney Chromophobe (TCGA, PanCancer Atlas)	TCGA-KN-8435-01	Chromophobe Renal Cell Carcinoma	E226Sfs*14	Frame_Shift_Del
Brain Lower Grade Glioma (TCGA, PanCancer Atlas)	TCGA-DB-A75K-01	Oligoastrocytoma	F799L	Missense_Mutation
Brain Lower Grade Glioma (TCGA, PanCancer Atlas)	TCGA-DU-6392-01	Astrocytoma	L644M	Missense_Mutation
Brain Lower Grade Glioma (TCGA, PanCancer Atlas)	TCGA-DU-6392-01	Astrocytoma	R848C	Missense_Mutation
Ovarian Serous Cystadenocarcinoma (TCGA, PanCancer Atlas)	TCGA-61-2008-01	Serous Ovarian Cancer	G563A	Missense_Mutation
Ovarian Serous Cystadenocarcinoma (TCGA, PanCancer Atlas)	TCGA-09-2043-01	Serous Ovarian Cancer	G163V	Missense_Mutation
Ovarian Serous Cystadenocarcinoma (TCGA, PanCancer Atlas)	TCGA-13-0807-01	Serous Ovarian Cancer	G149E	Missense_Mutation
Ovarian Serous Cystadenocarcinoma (TCGA, PanCancer Atlas)	TCGA-24-1463-01	Serous Ovarian Cancer	S154F	Missense_Mutation
Glioblastoma Multiforme (TCGA, PanCancer Atlas)	TCGA-06-0125-02	Glioblastoma Multiforme	Y126C	Missense_Mutation
Glioblastoma Multiforme (TCGA, PanCancer Atlas)	TCGA-06-1802-01	Glioblastoma Multiforme	K764E	Missense_Mutation
Glioblastoma Multiforme (TCGA, PanCancer Atlas)	TCGA-12-0775-01	Glioblastoma Multiforme	R562K	Missense_Mutation
Glioblastoma Multiforme (TCGA, PanCancer Atlas)	TCGA-19-5956-01	Glioblastoma Multiforme	R348M	Missense_Mutation
Sarcoma (TCGA, PanCancer Atlas)	TCGA-FX-A76Y-01	Leiomyosarcoma	E387D	Missense_Mutation
Sarcoma (TCGA, PanCancer Atlas)	TCGA-X6-A7WA-01	Leiomyosarcoma	G417V	Missense_Mutation
Lung Squamous Cell Carcinoma (TCGA, PanCancer Atlas)	TCGA-60-2708-01	Lung Squamous Cell Carcinoma	L172Qfs*10	Frame_Shift_Del
Lung Squamous Cell Carcinoma (TCGA, PanCancer Atlas)	TCGA-63-A5MM-01	Lung Squamous Cell Carcinoma	R511W	Missense_Mutation
Lung Squamous Cell Carcinoma (TCGA, PanCancer Atlas)	TCGA-77-7139-01	Lung Squamous Cell Carcinoma	K898M	Missense_Mutation
Lung Squamous Cell Carcinoma (TCGA, PanCancer Atlas)	TCGA-77-8008-01	Lung Squamous Cell Carcinoma	R348G	Missense_Mutation
Lung Squamous Cell Carcinoma (TCGA, PanCancer Atlas)	TCGA-77-8148-01	Lung Squamous Cell Carcinoma	R145L	Missense_Mutation
Lung Squamous Cell Carcinoma (TCGA, PanCancer Atlas)	TCGA-90-7964-01	Lung Squamous Cell Carcinoma	R706L	Missense_Mutation
Lung Squamous Cell Carcinoma (TCGA, PanCancer Atlas)	TCGA-96-8170-01	Lung Squamous Cell Carcinoma	E226G	Missense_Mutation
Lung Squamous Cell Carcinoma (TCGA, PanCancer Atlas)	TCGA-MF-A522-01	Lung Squamous Cell Carcinoma	S135*	Nonsense_Mutation
Lung Squamous Cell Carcinoma (TCGA, PanCancer Atlas)	TCGA-O2-A52S-01	Lung Squamous Cell Carcinoma	D615N	Missense_Mutation
Bladder Urothelial Carcinoma (TCGA, PanCancer Atlas)	TCGA-BT-A0YX-01	Bladder Urothelial Carcinoma	S158F	Missense_Mutation
Bladder Urothelial Carcinoma (TCGA, PanCancer Atlas)	TCGA-DK-A1A3-01	Bladder Urothelial Carcinoma	D868N	Missense_Mutation
Bladder Urothelial Carcinoma (TCGA, PanCancer Atlas)	TCGA-DK-A1AA-01	Bladder Urothelial Carcinoma	S105N	Missense_Mutation
Bladder Urothelial Carcinoma (TCGA, PanCancer Atlas)	TCGA-FD-A3SJ-01	Bladder Urothelial Carcinoma	S159*	Nonsense_Mutation
Bladder Urothelial Carcinoma (TCGA, PanCancer Atlas)	TCGA-H4-A2HQ-01	Bladder Urothelial Carcinoma	S51*	Nonsense_Mutation
Bladder Urothelial Carcinoma (TCGA, PanCancer Atlas)	TCGA-DK-A6B6-01	Bladder Urothelial Carcinoma	H921Y	Missense_Mutation
Bladder Urothelial Carcinoma (TCGA, PanCancer Atlas)	TCGA-E7-A678-01	Bladder Urothelial Carcinoma	N855S	Missense_Mutation
Bladder Urothelial Carcinoma (TCGA, PanCancer Atlas)	TCGA-E7-A7DU-01	Bladder Urothelial Carcinoma	S208L	Missense_Mutation
Bladder Urothelial Carcinoma (TCGA, PanCancer Atlas)	TCGA-FD-A6TC-01	Bladder Urothelial Carcinoma	A19G	Missense_Mutation
Bladder Urothelial Carcinoma (TCGA, PanCancer Atlas)	TCGA-FD-A6TK-01	Bladder Urothelial Carcinoma	R886S	Missense_Mutation
Bladder Urothelial Carcinoma (TCGA, PanCancer Atlas)	TCGA-KQ-A41S-01	Bladder Urothelial Carcinoma	D89N	Missense_Mutation
Bladder Urothelial Carcinoma (TCGA, PanCancer Atlas)	TCGA-UY-A78K-01	Bladder Urothelial Carcinoma	R223Pfs*20	Frame_Shift_Ins
Bladder Urothelial Carcinoma (TCGA, PanCancer Atlas)	TCGA-DK-AA6L-01	Bladder Urothelial Carcinoma	P161S	Missense_Mutation
Bladder Urothelial Carcinoma (TCGA, PanCancer Atlas)	TCGA-DK-AA6L-01	Bladder Urothelial Carcinoma	R325P	Missense_Mutation
Bladder Urothelial Carcinoma (TCGA, PanCancer Atlas)	TCGA-DK-AA6L-01	Bladder Urothelial Carcinoma	E337Q	Missense_Mutation
Bladder Urothelial Carcinoma (TCGA, PanCancer Atlas)	TCGA-YC-A89H-01	Bladder Urothelial Carcinoma	E337K	Missense_Mutation
Bladder Urothelial Carcinoma (TCGA, PanCancer Atlas)	TCGA-YC-A89H-01	Bladder Urothelial Carcinoma	S365L	Missense_Mutation
Acute Myeloid Leukemia (TCGA, PanCancer Atlas)	TCGA-AB-2826-03	Acute Myeloid Leukemia	R693H	Missense_Mutation
Liver Hepatocellular Carcinoma (TCGA, PanCancer Atlas)	TCGA-DD-AA3A-01	Hepatocellular Carcinoma	S64W	Missense_Mutation
Prostate Adenocarcinoma (TCGA, PanCancer Atlas)	TCGA-G9-6367-01	Prostate Adenocarcinoma	G902R	Missense_Mutation
Prostate Adenocarcinoma (TCGA, PanCancer Atlas)	TCGA-TP-A8TV-01	Prostate Adenocarcinoma	E337Rfs*45	Frame_Shift_Del
Kidney Renal Clear Cell Carcinoma (TCGA, PanCancer Atlas)	TCGA-B0-5096-01	Renal Clear Cell Carcinoma	R396C	Missense_Mutation
Uterine Corpus Endometrial Carcinoma (TCGA, PanCancer Atlas)	TCGA-EO-A22U-01	Uterine Endometrioid Carcinoma	R661H	Missense_Mutation
Uterine Corpus Endometrial Carcinoma (TCGA, PanCancer Atlas)	TCGA-EY-A549-01	Uterine Endometrioid Carcinoma	P284Lfs*98	Frame_Shift_Del
Uterine Corpus Endometrial Carcinoma (TCGA, PanCancer Atlas)	TCGA-AX-A0IW-01	Uterine Serous Carcinoma/Uterine Papillary Serous Carcinoma	R396C	Missense_Mutation
Uterine Corpus Endometrial Carcinoma (TCGA, PanCancer Atlas)	TCGA-A5-A0G2-01	Uterine Serous Carcinoma/Uterine Papillary Serous Carcinoma	G790D	Missense_Mutation
Uterine Corpus Endometrial Carcinoma (TCGA, PanCancer Atlas)	TCGA-AP-A051-01	Uterine Endometrioid Carcinoma	A157V	Missense_Mutation
Uterine Corpus Endometrial Carcinoma (TCGA, PanCancer Atlas)	TCGA-AX-A0J0-01	Uterine Endometrioid Carcinoma	K203N	Missense_Mutation
Uterine Corpus Endometrial Carcinoma (TCGA, PanCancer Atlas)	TCGA-B5-A0JY-01	Uterine Endometrioid Carcinoma	K445T	Missense_Mutation
Uterine Corpus Endometrial Carcinoma (TCGA, PanCancer Atlas)	TCGA-BS-A0UF-01	Uterine Endometrioid Carcinoma	N133H	Missense_Mutation
Uterine Corpus Endometrial Carcinoma (TCGA, PanCancer Atlas)	TCGA-D1-A167-01	Uterine Endometrioid Carcinoma	R729K	Missense_Mutation
Uterine Corpus Endometrial Carcinoma (TCGA, PanCancer Atlas)	TCGA-D1-A17Q-01	Uterine Endometrioid Carcinoma	E609K	Missense_Mutation
Uterine Corpus Endometrial Carcinoma (TCGA, PanCancer Atlas)	TCGA-EO-A3B0-01	Uterine Endometrioid Carcinoma	S130N	Missense_Mutation
Uterine Corpus Endometrial Carcinoma (TCGA, PanCancer Atlas)	TCGA-EO-A3B0-01	Uterine Endometrioid Carcinoma	N796S	Missense_Mutation
Uterine Corpus Endometrial Carcinoma (TCGA, PanCancer Atlas)	TCGA-EC-A1QX-01	Uterine Endometrioid Carcinoma	G138Afs*35	Frame_Shift_Del
Uterine Corpus Endometrial Carcinoma (TCGA, PanCancer Atlas)	TCGA-A5-A1OF-01	Uterine Mixed Endometrial Carcinoma	R456H	Missense_Mutation
Uterine Corpus Endometrial Carcinoma (TCGA, PanCancer Atlas)	TCGA-A5-A1OF-01	Uterine Mixed Endometrial Carcinoma	A862D	Missense_Mutation
Uterine Corpus Endometrial Carcinoma (TCGA, PanCancer Atlas)	TCGA-AJ-A5DW-01	Uterine Endometrioid Carcinoma	K87N	Missense_Mutation
Uterine Corpus Endometrial Carcinoma (TCGA, PanCancer Atlas)	TCGA-AP-A1DP-01	Uterine Endometrioid Carcinoma	R473G	Missense_Mutation
Uterine Corpus Endometrial Carcinoma (TCGA, PanCancer Atlas)	TCGA-AX-A06F-01	Uterine Endometrioid Carcinoma	S271G	Missense_Mutation
Uterine Corpus Endometrial Carcinoma (TCGA, PanCancer Atlas)	TCGA-AX-A06F-01	Uterine Endometrioid Carcinoma	S686N	Missense_Mutation
Uterine Corpus Endometrial Carcinoma (TCGA, PanCancer Atlas)	TCGA-AX-A1CE-01	Uterine Endometrioid Carcinoma	G650*	Nonsense_Mutation
Uterine Corpus Endometrial Carcinoma (TCGA, PanCancer Atlas)	TCGA-B5-A3FA-01	Uterine Endometrioid Carcinoma	A552V	Missense_Mutation
Uterine Corpus Endometrial Carcinoma (TCGA, PanCancer Atlas)	TCGA-BK-A6W3-01	Uterine Endometrioid Carcinoma	D934A	Missense_Mutation
Uterine Corpus Endometrial Carcinoma (TCGA, PanCancer Atlas)	TCGA-DF-A2KU-01	Uterine Endometrioid Carcinoma	D264Y	Missense_Mutation
Uterine Corpus Endometrial Carcinoma (TCGA, PanCancer Atlas)	TCGA-DF-A2KU-01	Uterine Endometrioid Carcinoma	R963K	Missense_Mutation
Uterine Corpus Endometrial Carcinoma (TCGA, PanCancer Atlas)	TCGA-EC-A24G-01	Uterine Endometrioid Carcinoma	V200I	Missense_Mutation
Uterine Corpus Endometrial Carcinoma (TCGA, PanCancer Atlas)	TCGA-EO-A22R-01	Uterine Endometrioid Carcinoma	D242Y	Missense_Mutation
Uterine Corpus Endometrial Carcinoma (TCGA, PanCancer Atlas)	TCGA-EO-A22U-01	Uterine Endometrioid Carcinoma	D101N	Missense_Mutation
Uterine Corpus Endometrial Carcinoma (TCGA, PanCancer Atlas)	TCGA-EO-A22U-01	Uterine Endometrioid Carcinoma	P334L	Missense_Mutation
Uterine Corpus Endometrial Carcinoma (TCGA, PanCancer Atlas)	TCGA-EO-A22U-01	Uterine Endometrioid Carcinoma	C667Y	Missense_Mutation
Uterine Corpus Endometrial Carcinoma (TCGA, PanCancer Atlas)	TCGA-EO-A22X-01	Uterine Endometrioid Carcinoma	E111D	Missense_Mutation
Uterine Corpus Endometrial Carcinoma (TCGA, PanCancer Atlas)	TCGA-EO-A22X-01	Uterine Endometrioid Carcinoma	S866R	Missense_Mutation
Uterine Corpus Endometrial Carcinoma (TCGA, PanCancer Atlas)	TCGA-EO-A3KX-01	Uterine Endometrioid Carcinoma	E363G	Missense_Mutation
Uterine Corpus Endometrial Carcinoma (TCGA, PanCancer Atlas)	TCGA-FI-A2D5-01	Uterine Endometrioid Carcinoma	Y251H	Missense_Mutation
Uterine Corpus Endometrial Carcinoma (TCGA, PanCancer Atlas)	TCGA-PG-A6IB-01	Uterine Serous Carcinoma/Uterine Papillary Serous Carcinoma	R57L	Missense_Mutation
Lung Adenocarcinoma (TCGA, PanCancer Atlas)	TCGA-95-7043-01	Lung Adenocarcinoma	G910Afs*41	Frame_Shift_Del
Lung Adenocarcinoma (TCGA, PanCancer Atlas)	TCGA-62-A46O-01	Lung Adenocarcinoma	S670F	Missense_Mutation
Lung Adenocarcinoma (TCGA, PanCancer Atlas)	TCGA-05-4432-01	Lung Adenocarcinoma	R574S	Missense_Mutation
Lung Adenocarcinoma (TCGA, PanCancer Atlas)	TCGA-44-7662-01	Lung Adenocarcinoma	D637Y	Missense_Mutation
Lung Adenocarcinoma (TCGA, PanCancer Atlas)	TCGA-91-6829-01	Lung Adenocarcinoma	S271N	Missense_Mutation
Lung Adenocarcinoma (TCGA, PanCancer Atlas)	TCGA-99-7458-01	Lung Adenocarcinoma	R396L	Missense_Mutation
Lung Adenocarcinoma (TCGA, PanCancer Atlas)	TCGA-35-4123-01	Lung Adenocarcinoma	R141L	Missense_Mutation
Lung Adenocarcinoma (TCGA, PanCancer Atlas)	TCGA-86-7711-01	Lung Adenocarcinoma	G772Wfs*38	Frame_Shift_Ins
Lung Adenocarcinoma (TCGA, PanCancer Atlas)	TCGA-99-8033-01	Lung Adenocarcinoma	R727*	Nonsense_Mutation
Lung Adenocarcinoma (TCGA, PanCancer Atlas)	TCGA-J2-8192-01	Lung Adenocarcinoma	R683C	Missense_Mutation
Lung Adenocarcinoma (TCGA, PanCancer Atlas)	TCGA-NJ-A7XG-01	Lung Adenocarcinoma	G213E	Missense_Mutation
Lung Adenocarcinoma (TCGA, PanCancer Atlas)	TCGA-17-Z031-01	Lung Adenocarcinoma	V605L	Missense_Mutation
Lung Adenocarcinoma (TCGA, PanCancer Atlas)	TCGA-17-Z031-01	Lung Adenocarcinoma	E927A	Missense_Mutation
Esophageal Adenocarcinoma (TCGA, PanCancer Atlas)	TCGA-IG-A97H-01	Esophageal Squamous Cell Carcinoma	S635N	Missense_Mutation
Esophageal Adenocarcinoma (TCGA, PanCancer Atlas)	TCGA-LN-A5U6-01	Esophageal Squamous Cell Carcinoma	A234S	Missense_Mutation
Esophageal Adenocarcinoma (TCGA, PanCancer Atlas)	TCGA-LN-A5U6-01	Esophageal Squamous Cell Carcinoma	A234V	Missense_Mutation
Esophageal Adenocarcinoma (TCGA, PanCancer Atlas)	TCGA-LN-A7HX-01	Esophageal Squamous Cell Carcinoma	G460A	Missense_Mutation
Skin Cutaneous Melanoma (TCGA, PanCancer Atlas)	TCGA-ER-A2NH-06	Cutaneous Melanoma	R706L	Missense_Mutation
Skin Cutaneous Melanoma (TCGA, PanCancer Atlas)	TCGA-EE-A2M5-06	Cutaneous Melanoma	L561*	Frame_Shift_Del
Skin Cutaneous Melanoma (TCGA, PanCancer Atlas)	TCGA-FW-A3R5-06	Cutaneous Melanoma	K232R	Missense_Mutation
Skin Cutaneous Melanoma (TCGA, PanCancer Atlas)	TCGA-BF-A1PZ-01	Cutaneous Melanoma	R67S	Missense_Mutation
Skin Cutaneous Melanoma (TCGA, PanCancer Atlas)	TCGA-EB-A3Y7-01	Cutaneous Melanoma	P907S	Missense_Mutation
Skin Cutaneous Melanoma (TCGA, PanCancer Atlas)	TCGA-FR-A726-01	Cutaneous Melanoma	P317S	Missense_Mutation
Skin Cutaneous Melanoma (TCGA, PanCancer Atlas)	TCGA-DA-A95Z-06	Cutaneous Melanoma	L816F	Missense_Mutation
Skin Cutaneous Melanoma (TCGA, PanCancer Atlas)	TCGA-EB-A299-01	Cutaneous Melanoma	W788L	Missense_Mutation
Skin Cutaneous Melanoma (TCGA, PanCancer Atlas)	TCGA-EE-A2GH-06	Cutaneous Melanoma	P671H	Missense_Mutation
Skin Cutaneous Melanoma (TCGA, PanCancer Atlas)	TCGA-ER-A19F-06	Cutaneous Melanoma	P671H	Missense_Mutation
Skin Cutaneous Melanoma (TCGA, PanCancer Atlas)	TCGA-ER-A1A1-06	Cutaneous Melanoma	R35S	Missense_Mutation
Skin Cutaneous Melanoma (TCGA, PanCancer Atlas)	TCGA-FS-A1ZC-06	Cutaneous Melanoma	R625L	Missense_Mutation
Skin Cutaneous Melanoma (TCGA, PanCancer Atlas)	TCGA-WE-A8K6-06	Cutaneous Melanoma	G178V	Missense_Mutation
Stomach Adenocarcinoma (TCGA, PanCancer Atlas)	TCGA-BR-8680-01	Tubular Stomach Adenocarcinoma	R663Q	Missense_Mutation
Stomach Adenocarcinoma (TCGA, PanCancer Atlas)	TCGA-BR-4184-01	Stomach Adenocarcinoma	R661H	Missense_Mutation
Stomach Adenocarcinoma (TCGA, PanCancer Atlas)	TCGA-BR-4201-01	Stomach Adenocarcinoma	D771G	Missense_Mutation
Stomach Adenocarcinoma (TCGA, PanCancer Atlas)	TCGA-CD-A4MI-01	Stomach Adenocarcinoma	P284Lfs*98	Frame_Shift_Del
Stomach Adenocarcinoma (TCGA, PanCancer Atlas)	TCGA-VQ-A91E-01	Tubular Stomach Adenocarcinoma	P284Lfs*98	Frame_Shift_Del
Stomach Adenocarcinoma (TCGA, PanCancer Atlas)	TCGA-D7-8575-01	Tubular Stomach Adenocarcinoma	T375M	Missense_Mutation
Stomach Adenocarcinoma (TCGA, PanCancer Atlas)	TCGA-D7-A4YV-01	Tubular Stomach Adenocarcinoma	G297C	Missense_Mutation
Stomach Adenocarcinoma (TCGA, PanCancer Atlas)	TCGA-IN-7808-01	Diffuse Type Stomach Adenocarcinoma	R630G	Missense_Mutation
Stomach Adenocarcinoma (TCGA, PanCancer Atlas)	TCGA-SW-A7EB-01	Mucinous Stomach Adenocarcinoma	S409F	Missense_Mutation
Stomach Adenocarcinoma (TCGA, PanCancer Atlas)	TCGA-CG-5721-01	Intestinal Type Stomach Adenocarcinoma	Q959Sfs*5	Frame_Shift_Ins
Stomach Adenocarcinoma (TCGA, PanCancer Atlas)	TCGA-BR-6456-01	Stomach Adenocarcinoma	P662Q	Missense_Mutation
Stomach Adenocarcinoma (TCGA, PanCancer Atlas)	TCGA-VQ-A8PP-01	Tubular Stomach Adenocarcinoma	R719C	Missense_Mutation
Breast Invasive Carcinoma (TCGA, PanCancer Atlas)	TCGA-A2-A0T7-01	Breast Invasive Ductal Carcinoma	G417Sfs*6	Frame_Shift_Del
Breast Invasive Carcinoma (TCGA, PanCancer Atlas)	TCGA-BH-A0EE-01	Breast Invasive Ductal Carcinoma	Q899R	Missense_Mutation
Breast Invasive Carcinoma (TCGA, PanCancer Atlas)	TCGA-AC-A23H-01	Breast Invasive Ductal Carcinoma	S873C	Missense_Mutation
Breast Invasive Carcinoma (TCGA, PanCancer Atlas)	TCGA-D8-A1JA-01	Breast Invasive Ductal Carcinoma	S749C	Missense_Mutation
Breast Invasive Carcinoma (TCGA, PanCancer Atlas)	TCGA-AC-A6NO-01	Breast Invasive Ductal Carcinoma	P854S	Missense_Mutation
Breast Invasive Carcinoma (TCGA, PanCancer Atlas)	TCGA-BH-A0HF-01	Breast Invasive Ductal Carcinoma	D188N	Missense_Mutation
Breast Invasive Carcinoma (TCGA, PanCancer Atlas)	TCGA-LL-A7SZ-01	Breast Invasive Ductal Carcinoma	G285V	Missense_Mutation
Pancreatic Adenocarcinoma (TCGA, PanCancer Atlas)	TCGA-IB-7651-01	Pancreatic Adenocarcinoma	R717*	Nonsense_Mutation
Pancreatic Adenocarcinoma (TCGA, PanCancer Atlas)	TCGA-IB-7651-01	Pancreatic Adenocarcinoma	A185V	Missense_Mutation
Pancreatic Adenocarcinoma (TCGA, PanCancer Atlas)	TCGA-HZ-7289-01	Pancreatic Adenocarcinoma	R616L	Missense_Mutation
Colorectal Adenocarcinoma (TCGA, PanCancer Atlas)	TCGA-AA-3713-01	Colon Adenocarcinoma	P284Lfs*98	Frame_Shift_Del
Colorectal Adenocarcinoma (TCGA, PanCancer Atlas)	TCGA-AA-A01P-01	Colon Adenocarcinoma	P284Lfs*98	Frame_Shift_Del
Colorectal Adenocarcinoma (TCGA, PanCancer Atlas)	TCGA-AA-3821-01	Mucinous Adenocarcinoma of the Colon and Rectum	G910Afs*41	Frame_Shift_Del
Colorectal Adenocarcinoma (TCGA, PanCancer Atlas)	TCGA-AA-3877-01	Mucinous Adenocarcinoma of the Colon and Rectum	L888H	Missense_Mutation
Colorectal Adenocarcinoma (TCGA, PanCancer Atlas)	TCGA-AA-3949-01	Mucinous Adenocarcinoma of the Colon and Rectum	R482H	Missense_Mutation
Colorectal Adenocarcinoma (TCGA, PanCancer Atlas)	TCGA-AA-A010-01	Colon Adenocarcinoma	S130N	Missense_Mutation
Colorectal Adenocarcinoma (TCGA, PanCancer Atlas)	TCGA-AG-3892-01	Rectal Adenocarcinoma	E530K	Missense_Mutation
Colorectal Adenocarcinoma (TCGA, PanCancer Atlas)	TCGA-AG-A002-01	Rectal Adenocarcinoma	L816I	Missense_Mutation
Colorectal Adenocarcinoma (TCGA, PanCancer Atlas)	TCGA-AA-A010-01	Colon Adenocarcinoma	E965D	Missense_Mutation
Colorectal Adenocarcinoma (TCGA, PanCancer Atlas)	TCGA-AZ-4315-01	Colon Adenocarcinoma	N796S	Missense_Mutation
Colorectal Adenocarcinoma (TCGA, PanCancer Atlas)	TCGA-DY-A0XA-01	Rectal Adenocarcinoma	Y947N	Missense_Mutation
Colorectal Adenocarcinoma (TCGA, PanCancer Atlas)	TCGA-EI-6917-01	Rectal Adenocarcinoma	R477Q	Missense_Mutation
Colorectal Adenocarcinoma (TCGA, PanCancer Atlas)	TCGA-F5-6814-01	Rectal Adenocarcinoma	R441W	Missense_Mutation
Colorectal Adenocarcinoma (TCGA, PanCancer Atlas)	TCGA-F5-6814-01	Rectal Adenocarcinoma	N721H	Missense_Mutation
Colorectal Adenocarcinoma (TCGA, PanCancer Atlas)	TCGA-AA-3712-01	Colon Adenocarcinoma	R705T	Missense_Mutation
Colorectal Adenocarcinoma (TCGA, PanCancer Atlas)	TCGA-AA-3712-01	Colon Adenocarcinoma	E738K	Missense_Mutation
Colorectal Adenocarcinoma (TCGA, PanCancer Atlas)	TCGA-AD-6895-01	Colon Adenocarcinoma	D660V	Missense_Mutation
Colorectal Adenocarcinoma (TCGA, PanCancer Atlas)	TCGA-AD-6964-01	Colon Adenocarcinoma	H666Q	Missense_Mutation
Colorectal Adenocarcinoma (TCGA, PanCancer Atlas)	TCGA-CA-6717-01	Mucinous Adenocarcinoma of the Colon and Rectum	N798S	Missense_Mutation
Colorectal Adenocarcinoma (TCGA, PanCancer Atlas)	TCGA-CM-4743-01	Colon Adenocarcinoma	L500M	Missense_Mutation
Colorectal Adenocarcinoma (TCGA, PanCancer Atlas)	TCGA-CM-6162-01	Mucinous Adenocarcinoma of the Colon and Rectum	T386M	Missense_Mutation
Colorectal Adenocarcinoma (TCGA, PanCancer Atlas)	TCGA-CM-6171-01	Colon Adenocarcinoma	R748C	Missense_Mutation
Colorectal Adenocarcinoma (TCGA, PanCancer Atlas)	TCGA-D5-6928-01	Mucinous Adenocarcinoma of the Colon and Rectum	D879N	Missense_Mutation
Colorectal Adenocarcinoma (TCGA, PanCancer Atlas)	TCGA-F4-6856-01	Mucinous Adenocarcinoma of the Colon and Rectum	P592Qfs*23	Frame_Shift_Del
Colorectal Adenocarcinoma (TCGA, PanCancer Atlas)	TCGA-G4-6309-01	Colon Adenocarcinoma	S120G	Missense_Mutation
Colorectal Adenocarcinoma (TCGA, PanCancer Atlas)	TCGA-NH-A5IV-01	Colon Adenocarcinoma	D559Y	Missense_Mutation
Kidney Renal Papillary Cell Carcinoma (TCGA, PanCancer Atlas)	TCGA-DW-7840-01	Papillary Renal Cell Carcinoma	T544S	Missense_Mutation
Kidney Renal Papillary Cell Carcinoma (TCGA, PanCancer Atlas)	TCGA-HE-7129-01	Papillary Renal Cell Carcinoma	R67S	Missense_Mutation
Kidney Renal Papillary Cell Carcinoma (TCGA, PanCancer Atlas)	TCGA-A4-8098-01	Papillary Renal Cell Carcinoma	G379C	Missense_Mutation
Head and Neck Squamous Cell Carcinoma (TCGA, PanCancer Atlas)	TCGA-CQ-6228-01	Head and Neck Squamous Cell Carcinoma	S670F	Missense_Mutation
Head and Neck Squamous Cell Carcinoma (TCGA, PanCancer Atlas)	TCGA-D6-6517-01	Head and Neck Squamous Cell Carcinoma	A858Cfs*11	Frame_Shift_Ins
Head and Neck Squamous Cell Carcinoma (TCGA, PanCancer Atlas)	TCGA-QK-A6VB-01	Head and Neck Squamous Cell Carcinoma	K641M	Missense_Mutation
Head and Neck Squamous Cell Carcinoma (TCGA, PanCancer Atlas)	TCGA-CV-7568-01	Head and Neck Squamous Cell Carcinoma	R477*	Nonsense_Mutation
Head and Neck Squamous Cell Carcinoma (TCGA, PanCancer Atlas)	TCGA-CV-7421-01	Head and Neck Squamous Cell Carcinoma	E710*	Nonsense_Mutation
Cervical Squamous Cell Carcinoma (TCGA, PanCancer Atlas)	TCGA-EA-A3Y4-01	Cervical Squamous Cell Carcinoma	Q33*	Nonsense_Mutation
Cervical Squamous Cell Carcinoma (TCGA, PanCancer Atlas)	TCGA-DR-A0ZM-01	Cervical Squamous Cell Carcinoma	D199Y	Missense_Mutation
Cervical Squamous Cell Carcinoma (TCGA, PanCancer Atlas)	TCGA-C5-A7CO-01	Cervical Squamous Cell Carcinoma	G47E	Missense_Mutation
Cervical Squamous Cell Carcinoma (TCGA, PanCancer Atlas)	TCGA-2W-A8YY-01	Cervical Squamous Cell Carcinoma	K132N	Missense_Mutation
Cervical Squamous Cell Carcinoma (TCGA, PanCancer Atlas)	TCGA-2W-A8YY-01	Cervical Squamous Cell Carcinoma	A469V	Missense_Mutation
Cervical Squamous Cell Carcinoma (TCGA, PanCancer Atlas)	TCGA-2W-A8YY-01	Cervical Squamous Cell Carcinoma	R706Q	Missense_Mutation
Cervical Squamous Cell Carcinoma (TCGA, PanCancer Atlas)	TCGA-VS-A8QM-01	Cervical Squamous Cell Carcinoma	S135Lfs*38	Frame_Shift_Del
Cervical Squamous Cell Carcinoma (TCGA, PanCancer Atlas)	TCGA-C5-A8YQ-01	Cervical Squamous Cell Carcinoma	RBM15-ZYG11B	fusion
